# Supplementary material
Source: Springer Nature journal article supplement (https://www.springermedizin.de/resource/supplementary/12967_2007_183_MOESM3_ESM.pdf/9575876)

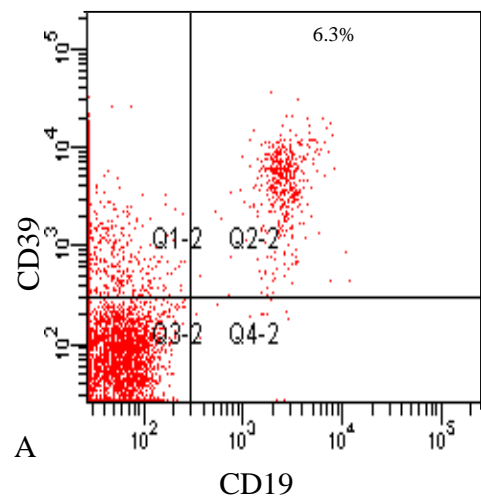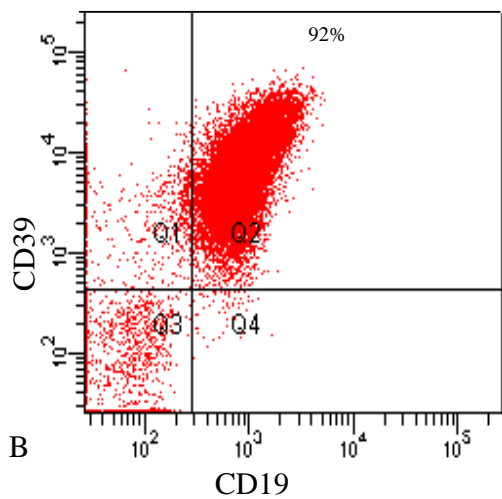

Supplement: MOESM3 [file 9575876]
